# Supplementary material
Source: PubMed Central journal article supplement (PMC11097675)

# **Supplemental Figures**

Lack of Mitochondrial Cyp2E1 Drives  
Acetaminophen-induced ER Stress-  
mediated Apoptosis in Mouse and Human  
Kidneys: Inhibition by 4-Methylpyrazole but  
not N-Acetylcysteine

Jephte Y. Akakpo, Anup Ramachandran,  
Barry H. Rumack, Darren P. Wallace, and  
Hartmut Jaeschke

# Control

A

Kidney

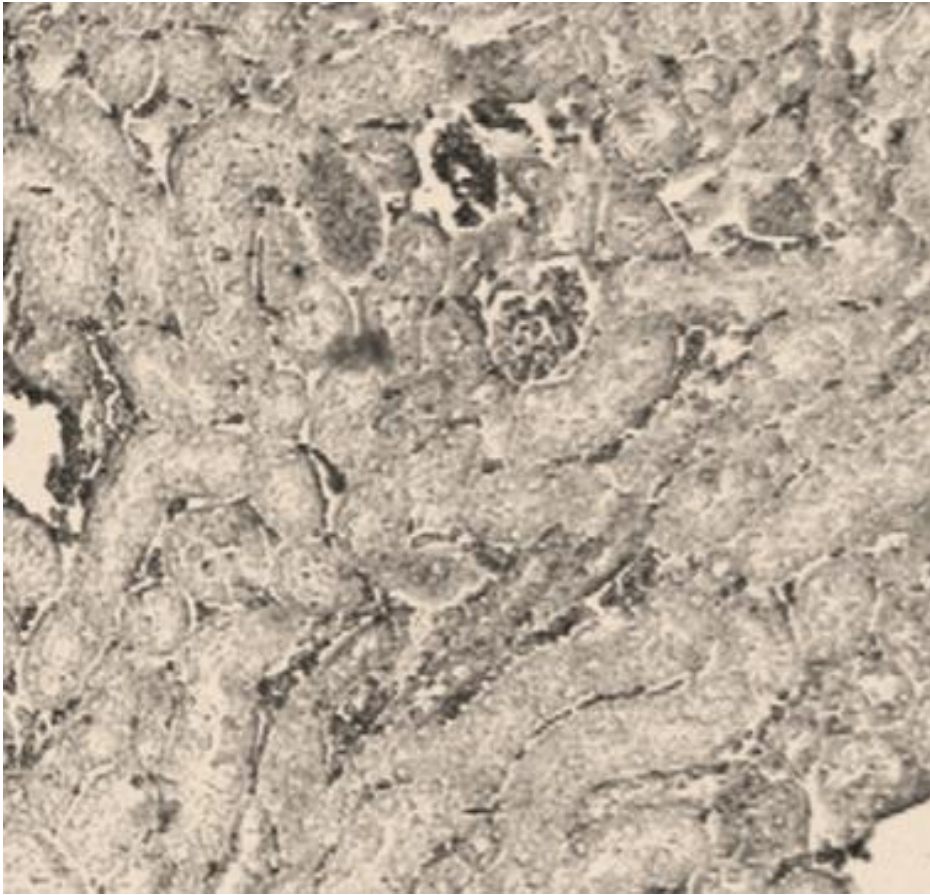

B

Liver

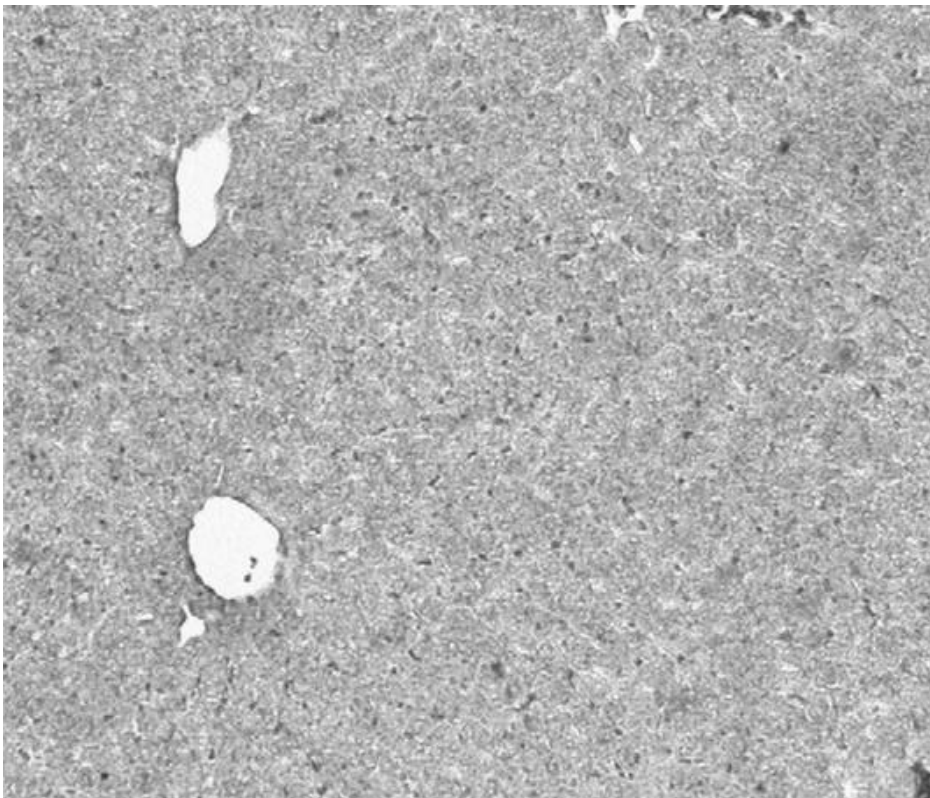

**Figure S1A: TUNEL staining in control tissue.** Control mice were fasted overnight. Animals were refed in all experiments that lasted > 6 hours

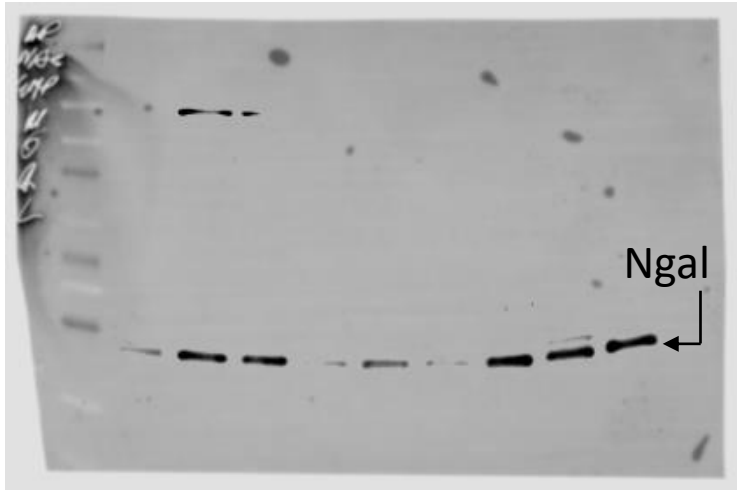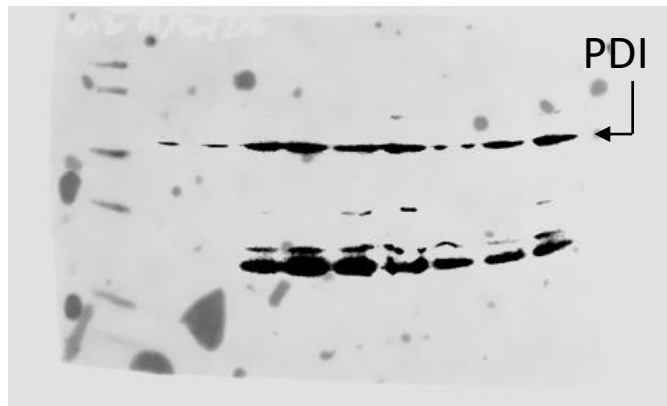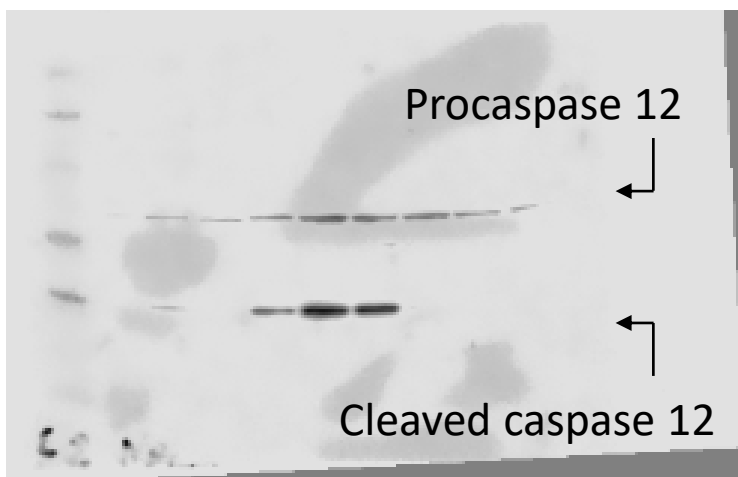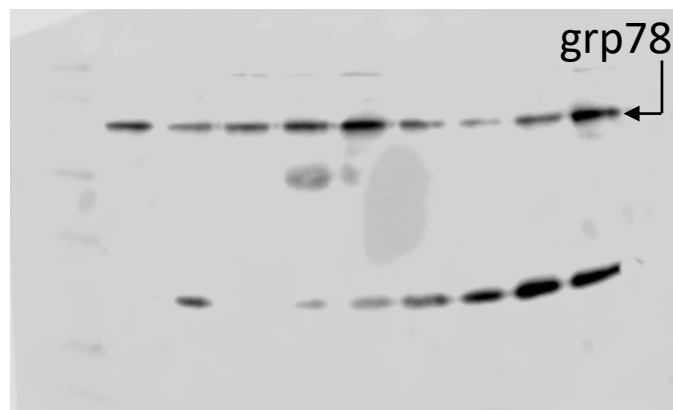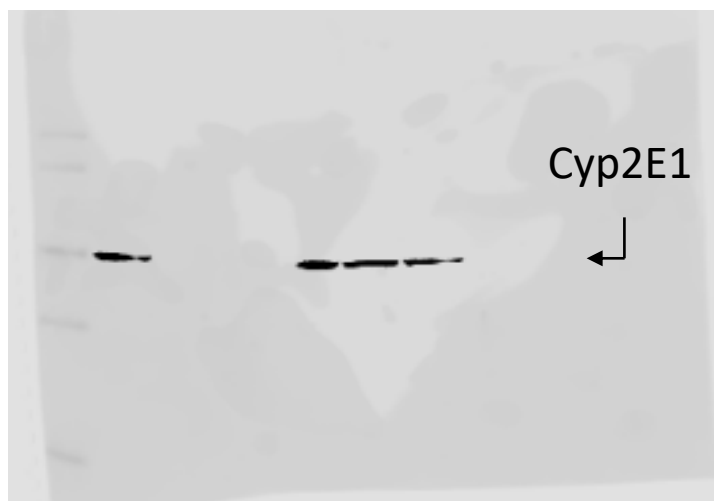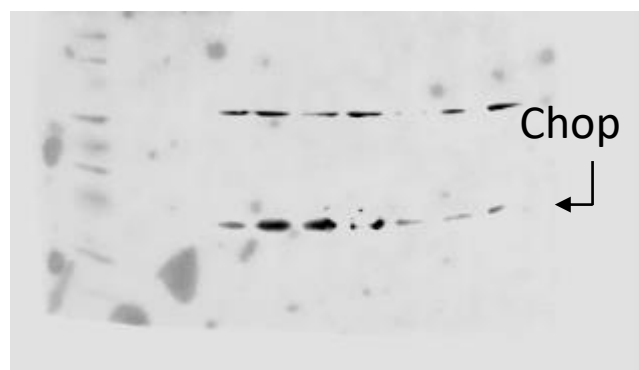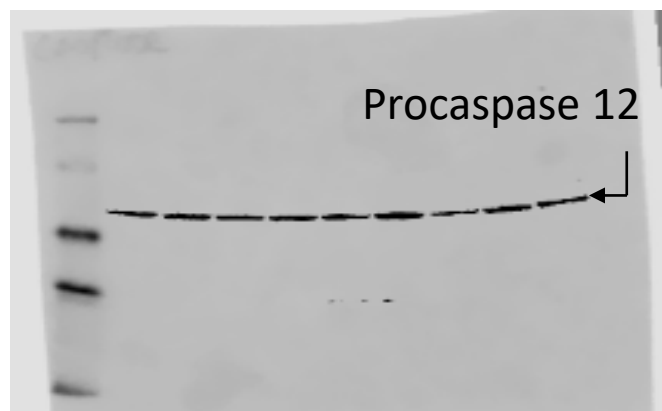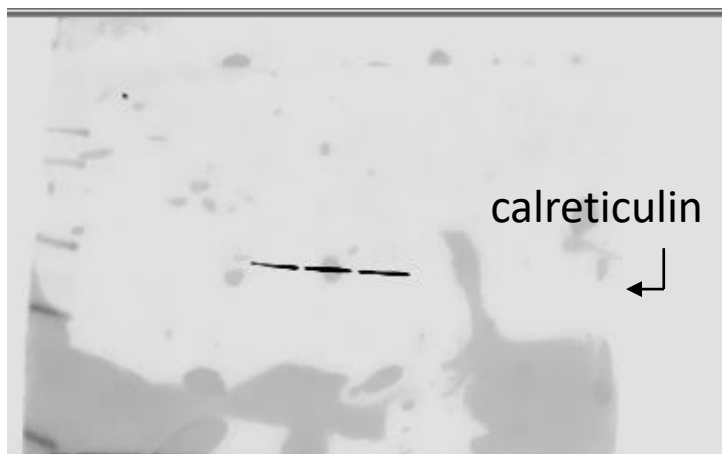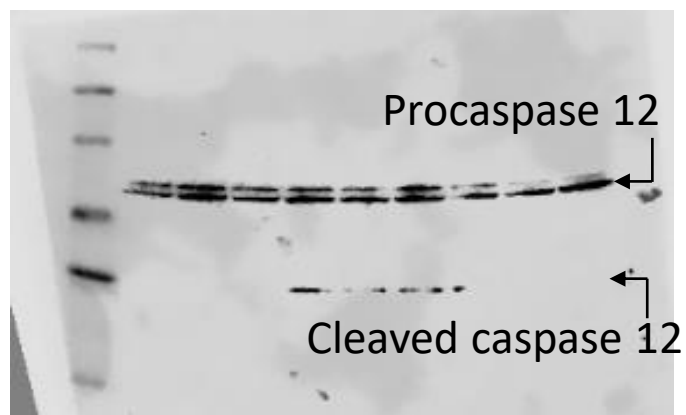

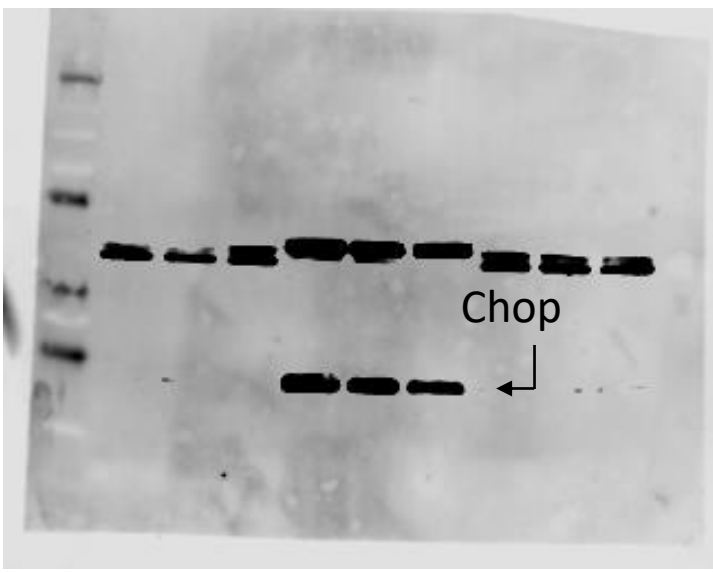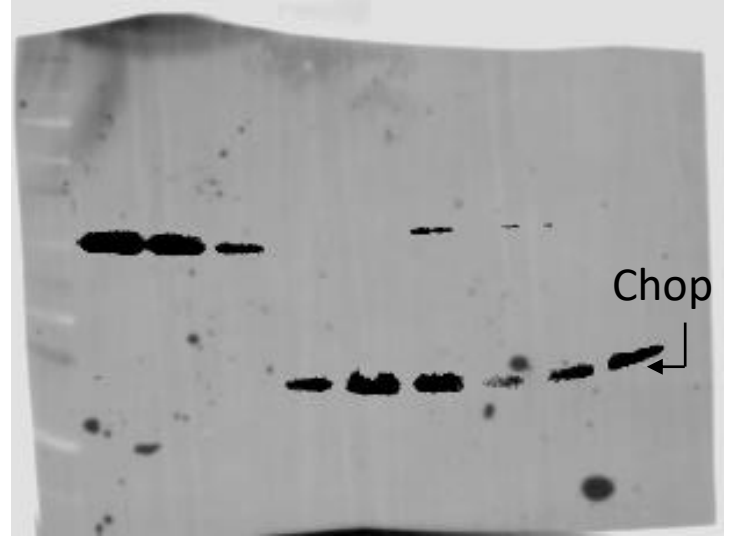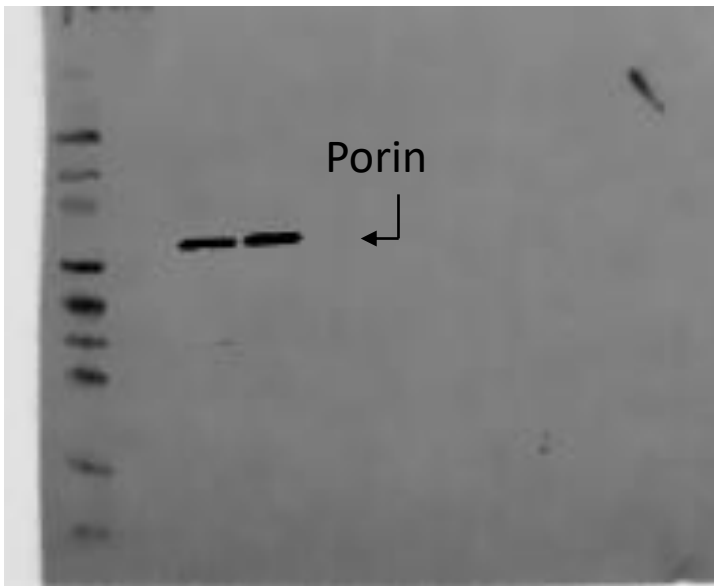

Supplement: NIHMS1992386-supplement-Supplement.pdf [file NIHMS1992386-supplement-Supplement.pdf]
